# Supplementary material for: Transcriptome analysis and differential gene expression profiling of two contrasting quinoa genotypes in response to salt stress
Source: BMC Plant Biol. 2020 Dec 30;20:568. doi: 10.1186/s12870-020-02753-1 (PMC7774241; doi:10.1186/s12870-020-02753-1)
Supplement: Supplementary file 3 — Additional file 3: Table S3. GO enrichment analysis of the DEGs in ST/SS at different time points. [file 12870_2020_2753_MOESM3_ESM.xlsx]

## Sheet: Sheet1
Table S3 GO enrichment analysis of the DEGs in ST/SS at different time points
GO term	Ontology	Description	ST_0.5h		ST_2h		ST_24h		SS_0.5h		SS_2h		SS_24h
			RDR	Count	RDR	Count	RDR	Count	RDR	Count	RDR	Count	RDR	Count
GO:1901564	P	organonitrogen compound metabolic process	#N/A	#N/A	#N/A	#N/A	7e-12	381	#N/A	#N/A	#N/A	#N/A	0.00018	302
GO:0006412	P	translation	#N/A	#N/A	#N/A	#N/A	5.7e-10	214	#N/A	#N/A	#N/A	#N/A	2.7e-05	178
GO:0006518	P	peptide metabolic process	#N/A	#N/A	#N/A	#N/A	5.7e-10	220	#N/A	#N/A	#N/A	#N/A	5.4e-05	180
GO:0043603	P	cellular amide metabolic process	#N/A	#N/A	#N/A	#N/A	5.7e-10	222	#N/A	#N/A	#N/A	#N/A	6.6e-05	181
GO:0043043	P	peptide biosynthetic process	#N/A	#N/A	#N/A	#N/A	5.7e-10	216	#N/A	#N/A	#N/A	#N/A	3.2e-05	178
GO:0043604	P	amide biosynthetic process	#N/A	#N/A	#N/A	#N/A	5.7e-10	216	#N/A	#N/A	#N/A	#N/A	3.2e-05	178
GO:1901566	P	organonitrogen compound biosynthetic process	#N/A	#N/A	#N/A	#N/A	9.3e-08	283	#N/A	#N/A	#N/A	#N/A	0.00061	237
GO:0044710	P	single-organism metabolic process	0.0077	96	0.00038	909	1.5e-06	761	0.015	135	0.0012	629	0.0026	669
GO:0055114	P	oxidation-reduction process	9.4e-06	76	2.2e-05	584	7.8e-05	467	0.00095	97	6.9e-06	420	2.2e-05	447
GO:0044281	P	small molecule metabolic process	#N/A	#N/A	#N/A	#N/A	9.5e-05	243	#N/A	#N/A	#N/A	#N/A	#N/A	#N/A
GO:0006810	P	transport	#N/A	#N/A	0.046	502	0.00024	436	#N/A	#N/A	0.0012	371	1.8e-05	428
GO:0051179	P	localization	#N/A	#N/A	0.046	509	0.00027	441	#N/A	#N/A	0.0024	371	1.8e-05	431
GO:0051234	P	establishment of localization	#N/A	#N/A	0.046	505	0.00029	437	#N/A	#N/A	0.0015	371	1.8e-05	428
GO:0044723	P	single-organism carbohydrate metabolic process	#N/A	#N/A	#N/A	#N/A	0.00074	90	#N/A	#N/A	#N/A	#N/A	#N/A	#N/A
GO:0006979	P	response to oxidative stress	1.1e-07	25	1.1e-06	121	0.00095	86	4.6e-06	30	6.6e-09	98	2.9e-05	90
GO:0044699	P	single-organism process	#N/A	#N/A	1.4e-05	1292	0.001	1005	#N/A	#N/A	0.0019	869	0.0026	932
GO:1901565	P	organonitrogen compound catabolic process	#N/A	#N/A	#N/A	#N/A	0.0036	26	#N/A	#N/A	#N/A	#N/A	#N/A	#N/A
GO:0005975	P	carbohydrate metabolic process	0.0016	35	0.008	260	0.0054	212	0.00028	54	0.0013	189	#N/A	#N/A
GO:0006082	P	organic acid metabolic process	#N/A	#N/A	#N/A	#N/A	0.0054	153	#N/A	#N/A	#N/A	#N/A	#N/A	#N/A
GO:0008202	P	steroid metabolic process	#N/A	#N/A	#N/A	#N/A	0.0095	21	#N/A	#N/A	#N/A	#N/A	0.033	18
GO:0044262	P	cellular carbohydrate metabolic process	1.7e-06	17	0.00097	70	0.01	53	0.0069	14	3.7e-06	61	6.9e-05	60
GO:0006694	P	steroid biosynthetic process	#N/A	#N/A	#N/A	#N/A	0.012	20	#N/A	#N/A	#N/A	#N/A	0.04	17
GO:0006099	P	tricarboxylic acid cycle	#N/A	#N/A	#N/A	#N/A	0.014	12	#N/A	#N/A	#N/A	#N/A	#N/A	#N/A
GO:1901135	P	carbohydrate derivative metabolic process	#N/A	#N/A	#N/A	#N/A	0.014	102	#N/A	#N/A	#N/A	#N/A	#N/A	#N/A
GO:0009060	P	aerobic respiration	#N/A	#N/A	#N/A	#N/A	0.014	13	#N/A	#N/A	#N/A	#N/A	#N/A	#N/A
GO:0015992	P	proton transport	#N/A	#N/A	#N/A	#N/A	0.016	35	#N/A	#N/A	#N/A	#N/A	#N/A	#N/A
GO:0006818	P	hydrogen transport	#N/A	#N/A	#N/A	#N/A	0.016	35	#N/A	#N/A	#N/A	#N/A	#N/A	#N/A
GO:0006914	P	autophagy	#N/A	#N/A	#N/A	#N/A	0.024	13	#N/A	#N/A	#N/A	#N/A	#N/A	#N/A
GO:0019318	P	hexose metabolic process	#N/A	#N/A	#N/A	#N/A	0.026	16	#N/A	#N/A	#N/A	#N/A	#N/A	#N/A
GO:0006886	P	intracellular protein transport	#N/A	#N/A	#N/A	#N/A	0.027	60	#N/A	#N/A	#N/A	#N/A	#N/A	#N/A
GO:1901576	P	organic substance biosynthetic process	#N/A	#N/A	#N/A	#N/A	0.029	622	#N/A	#N/A	#N/A	#N/A	#N/A	#N/A
GO:0046395	P	carboxylic acid catabolic process	#N/A	#N/A	#N/A	#N/A	0.029	11	#N/A	#N/A	#N/A	#N/A	#N/A	#N/A
GO:0044282	P	small molecule catabolic process	#N/A	#N/A	#N/A	#N/A	0.029	16	#N/A	#N/A	#N/A	#N/A	#N/A	#N/A
GO:0005996	P	monosaccharide metabolic process	#N/A	#N/A	#N/A	#N/A	0.033	17	#N/A	#N/A	#N/A	#N/A	#N/A	#N/A
GO:0019693	P	ribose phosphate metabolic process	#N/A	#N/A	#N/A	#N/A	0.033	52	#N/A	#N/A	#N/A	#N/A	#N/A	#N/A
GO:0043436	P	oxoacid metabolic process	#N/A	#N/A	#N/A	#N/A	0.033	131	#N/A	#N/A	#N/A	#N/A	#N/A	#N/A
GO:0009058	P	biosynthetic process	#N/A	#N/A	#N/A	#N/A	0.035	650	#N/A	#N/A	#N/A	#N/A	#N/A	#N/A
GO:0046348	P	amino sugar catabolic process	#N/A	#N/A	0.03	15	0.035	12	#N/A	#N/A	0.0013	14	#N/A	#N/A
GO:1901072	P	glucosamine-containing compound catabolic process	#N/A	#N/A	0.03	15	0.035	12	#N/A	#N/A	0.0013	14	#N/A	#N/A
GO:1901071	P	glucosamine-containing compound metabolic process	#N/A	#N/A	0.03	15	0.035	12	#N/A	#N/A	0.0013	14	#N/A	#N/A
GO:0006030	P	chitin metabolic process	#N/A	#N/A	0.03	15	0.035	12	#N/A	#N/A	0.0013	14	#N/A	#N/A
GO:0006032	P	chitin catabolic process	#N/A	#N/A	0.03	15	0.035	12	#N/A	#N/A	0.0013	14	#N/A	#N/A
GO:0009063	P	cellular amino acid catabolic process	#N/A	#N/A	#N/A	#N/A	0.035	8	#N/A	#N/A	#N/A	#N/A	#N/A	#N/A
GO:0019752	P	carboxylic acid metabolic process	#N/A	#N/A	#N/A	#N/A	0.035	129	#N/A	#N/A	#N/A	#N/A	#N/A	#N/A
GO:0034613	P	cellular protein localization	#N/A	#N/A	#N/A	#N/A	0.035	65	#N/A	#N/A	#N/A	#N/A	#N/A	#N/A
GO:0006026	P	aminoglycan catabolic process	#N/A	#N/A	0.03	15	0.035	12	#N/A	#N/A	0.0013	14	#N/A	#N/A
GO:0070727	P	cellular macromolecule localization	#N/A	#N/A	#N/A	#N/A	0.035	65	#N/A	#N/A	#N/A	#N/A	#N/A	#N/A
GO:0006040	P	amino sugar metabolic process	#N/A	#N/A	0.03	15	0.035	12	#N/A	#N/A	0.0013	14	#N/A	#N/A
GO:0015672	P	monovalent inorganic cation transport	#N/A	#N/A	#N/A	#N/A	0.037	43	#N/A	#N/A	#N/A	#N/A	#N/A	#N/A
GO:0015031	P	protein transport	#N/A	#N/A	#N/A	#N/A	0.042	69	#N/A	#N/A	#N/A	#N/A	#N/A	#N/A
GO:0006753	P	nucleoside phosphate metabolic process	#N/A	#N/A	#N/A	#N/A	0.043	61	#N/A	#N/A	#N/A	#N/A	#N/A	#N/A
GO:0046907	P	intracellular transport	#N/A	#N/A	#N/A	#N/A	0.043	67	#N/A	#N/A	#N/A	#N/A	#N/A	#N/A
GO:0051649	P	establishment of localization in cell	#N/A	#N/A	#N/A	#N/A	0.043	67	#N/A	#N/A	#N/A	#N/A	#N/A	#N/A
GO:0006022	P	aminoglycan metabolic process	#N/A	#N/A	#N/A	#N/A	0.044	14	#N/A	#N/A	0.0019	16	0.04	14
GO:0015991	P	ATP hydrolysis coupled proton transport	#N/A	#N/A	#N/A	#N/A	0.048	19	#N/A	#N/A	#N/A	#N/A	#N/A	#N/A
GO:0015988	P	energy coupled proton transmembrane transport, against electrochemical gradient	#N/A	#N/A	#N/A	#N/A	0.048	19	#N/A	#N/A	#N/A	#N/A	#N/A	#N/A
GO:0055086	P	nucleobase-containing small molecule metabolic process	#N/A	#N/A	#N/A	#N/A	0.048	70	#N/A	#N/A	#N/A	#N/A	#N/A	#N/A
GO:0090662	P	ATP hydrolysis coupled transmembrane transport	#N/A	#N/A	#N/A	#N/A	0.048	19	#N/A	#N/A	#N/A	#N/A	#N/A	#N/A
GO:1902600	P	hydrogen ion transmembrane transport	#N/A	#N/A	#N/A	#N/A	0.049	28	#N/A	#N/A	#N/A	#N/A	#N/A	#N/A
GO:0006163	P	purine nucleotide metabolic process	#N/A	#N/A	#N/A	#N/A	0.049	50	#N/A	#N/A	#N/A	#N/A	#N/A	#N/A
GO:0008104	P	protein localization	#N/A	#N/A	#N/A	#N/A	0.05	74	#N/A	#N/A	#N/A	#N/A	#N/A	#N/A
GO:0015980	P	energy derivation by oxidation of organic compounds	#N/A	#N/A	#N/A	#N/A	0.05	13	#N/A	#N/A	#N/A	#N/A	#N/A	#N/A
GO:0005976	P	polysaccharide metabolic process	1.7e-08	19	0.0011	56	0.05	37	0.0015	14	6e-05	46	0.0012	44
GO:0016998	P	cell wall macromolecule catabolic process	#N/A	#N/A	0.024	18	0.05	13	#N/A	#N/A	0.00032	18	#N/A	#N/A
GO:0016054	P	organic acid catabolic process	#N/A	#N/A	#N/A	#N/A	0.05	11	#N/A	#N/A	#N/A	#N/A	#N/A	#N/A
GO:0006811	P	ion transport	#N/A	#N/A	#N/A	#N/A	0.05	117	#N/A	#N/A	0.035	103	0.0026	123
GO:0045333	P	cellular respiration	#N/A	#N/A	#N/A	#N/A	0.05	13	#N/A	#N/A	#N/A	#N/A	#N/A	#N/A
GO:0009117	P	nucleotide metabolic process	#N/A	#N/A	#N/A	#N/A	0.05	59	#N/A	#N/A	#N/A	#N/A	#N/A	#N/A
GO:0044042	P	glucan metabolic process	8e-08	16	0.0049	45	0.05	31	0.0015	12	5.4e-05	40	0.00029	40
GO:0072521	P	purine-containing compound metabolic process	#N/A	#N/A	#N/A	#N/A	0.05	50	#N/A	#N/A	#N/A	#N/A	#N/A	#N/A
GO:0006073	P	cellular glucan metabolic process	8e-08	16	0.0049	45	0.05	31	0.0015	12	5.4e-05	40	0.00029	40
GO:0044264	P	cellular polysaccharide metabolic process	8e-08	16	0.0045	46	#N/A	#N/A	0.0016	12	7.1e-05	40	0.0004	40
GO:2001141	P	regulation of RNA biosynthetic process	1.1e-07	58	#N/A	#N/A	#N/A	#N/A	0.002	60	0.00085	245	#N/A	#N/A
GO:0008152	P	metabolic process	1.1e-07	299	9.3e-06	2715	#N/A	#N/A	5.7e-06	417	2.5e-09	1940	0.0029	1974
GO:0006355	P	regulation of transcription, DNA-templated	1.1e-07	58	#N/A	#N/A	#N/A	#N/A	0.002	60	0.00085	245	#N/A	#N/A
GO:1903506	P	regulation of nucleic acid-templated transcription	1.1e-07	58	#N/A	#N/A	#N/A	#N/A	0.002	60	0.00085	245	#N/A	#N/A
GO:0051252	P	regulation of RNA metabolic process	1.1e-07	58	#N/A	#N/A	#N/A	#N/A	0.0021	60	0.00094	245	#N/A	#N/A
GO:0009889	P	regulation of biosynthetic process	1.7e-07	58	#N/A	#N/A	#N/A	#N/A	0.0015	63	0.00072	252	#N/A	#N/A
GO:0010556	P	regulation of macromolecule biosynthetic process	1.7e-07	58	#N/A	#N/A	#N/A	#N/A	0.0015	63	0.00072	252	#N/A	#N/A
GO:0031326	P	regulation of cellular biosynthetic process	1.7e-07	58	#N/A	#N/A	#N/A	#N/A	0.0015	63	0.00072	252	#N/A	#N/A
GO:2000112	P	regulation of cellular macromolecule biosynthetic process	1.7e-07	58	#N/A	#N/A	#N/A	#N/A	0.0015	63	0.00072	252	#N/A	#N/A
GO:0019219	P	regulation of nucleobase-containing compound metabolic process	1.7e-07	58	#N/A	#N/A	#N/A	#N/A	0.0029	60	0.00072	251	#N/A	#N/A
GO:0051171	P	regulation of nitrogen compound metabolic process	2.5e-07	58	#N/A	#N/A	#N/A	#N/A	0.0016	63	0.00072	255	#N/A	#N/A
GO:0010468	P	regulation of gene expression	2.6e-07	58	#N/A	#N/A	#N/A	#N/A	0.0017	63	0.0019	249	#N/A	#N/A
GO:0080090	P	regulation of primary metabolic process	3.7e-07	58	#N/A	#N/A	#N/A	#N/A	0.002	63	0.0012	255	#N/A	#N/A
GO:0031323	P	regulation of cellular metabolic process	3.7e-07	58	#N/A	#N/A	#N/A	#N/A	0.002	63	0.0013	255	#N/A	#N/A
GO:0060255	P	regulation of macromolecule metabolic process	6.3e-07	58	#N/A	#N/A	#N/A	#N/A	0.0027	63	0.0024	255	#N/A	#N/A
GO:0019222	P	regulation of metabolic process	7.6e-07	58	#N/A	#N/A	#N/A	#N/A	0.0029	63	0.0032	255	#N/A	#N/A
GO:0097659	P	nucleic acid-templated transcription	9.3e-06	58	#N/A	#N/A	#N/A	#N/A	0.015	63	0.03	262	#N/A	#N/A
GO:0006351	P	transcription, DNA-templated	9.3e-06	58	#N/A	#N/A	#N/A	#N/A	0.015	63	0.03	262	#N/A	#N/A
GO:0032774	P	RNA biosynthetic process	9.4e-06	58	#N/A	#N/A	#N/A	#N/A	0.012	64	0.033	262	#N/A	#N/A
GO:0034654	P	nucleobase-containing compound biosynthetic process	2.3e-05	60	#N/A	#N/A	#N/A	#N/A	0.033	65	#N/A	#N/A	#N/A	#N/A
GO:0019438	P	aromatic compound biosynthetic process	4.4e-05	62	#N/A	#N/A	#N/A	#N/A	0.04	68	#N/A	#N/A	#N/A	#N/A
GO:1901362	P	organic cyclic compound biosynthetic process	5.3e-05	64	#N/A	#N/A	#N/A	#N/A	0.033	72	#N/A	#N/A	#N/A	#N/A
GO:0018130	P	heterocycle biosynthetic process	0.00011	61	#N/A	#N/A	#N/A	#N/A	0.037	69	#N/A	#N/A	#N/A	#N/A
GO:0050794	P	regulation of cellular process	0.00021	64	#N/A	#N/A	#N/A	#N/A	0.007	80	0.0012	351	#N/A	#N/A
GO:0043170	P	macromolecule metabolic process	0.00025	169	#N/A	#N/A	#N/A	#N/A	#N/A	#N/A	#N/A	#N/A	#N/A	#N/A
GO:0065007	P	biological regulation	0.00041	67	#N/A	#N/A	#N/A	#N/A	0.007	86	0.0041	370	#N/A	#N/A
GO:0050789	P	regulation of biological process	0.00041	64	#N/A	#N/A	#N/A	#N/A	0.014	80	0.0025	354	#N/A	#N/A
GO:0071704	P	organic substance metabolic process	0.0011	210	#N/A	#N/A	#N/A	#N/A	0.035	285	0.011	1364	#N/A	#N/A
GO:0044260	P	cellular macromolecule metabolic process	0.0012	148	#N/A	#N/A	#N/A	#N/A	#N/A	#N/A	#N/A	#N/A	#N/A	#N/A
GO:0006950	P	response to stress	0.0013	32	0.00033	244	#N/A	#N/A	1.5e-05	53	1.1e-05	185	0.033	168
GO:0044238	P	primary metabolic process	0.0014	199	#N/A	#N/A	#N/A	#N/A	#N/A	#N/A	#N/A	#N/A	#N/A	#N/A
GO:0036211	P	protein modification process	0.0019	70	1.6e-08	663	#N/A	#N/A	0.037	89	1.2e-14	517	#N/A	#N/A
GO:0006464	P	cellular protein modification process	0.0019	70	1.6e-08	663	#N/A	#N/A	0.037	89	1.2e-14	517	#N/A	#N/A
GO:0006470	P	protein dephosphorylation	0.0031	10	#N/A	#N/A	#N/A	#N/A	0.00056	16	#N/A	#N/A	#N/A	#N/A
GO:0016311	P	dephosphorylation	0.0031	10	#N/A	#N/A	#N/A	#N/A	0.00056	16	#N/A	#N/A	#N/A	#N/A
GO:0016567	P	protein ubiquitination	0.0037	9	#N/A	#N/A	#N/A	#N/A	#N/A	#N/A	0.001	40	#N/A	#N/A
GO:0043412	P	macromolecule modification	0.0037	70	2.4e-07	667	#N/A	#N/A	#N/A	#N/A	3.2e-13	519	#N/A	#N/A
GO:0032446	P	protein modification by small protein conjugation	0.005	9	#N/A	#N/A	#N/A	#N/A	#N/A	#N/A	0.0012	41	#N/A	#N/A
GO:0016070	P	RNA metabolic process	0.0058	60	#N/A	#N/A	#N/A	#N/A	#N/A	#N/A	#N/A	#N/A	#N/A	#N/A
GO:0006793	P	phosphorus metabolic process	0.0065	67	1.6e-08	665	#N/A	#N/A	#N/A	#N/A	3.2e-14	515	#N/A	#N/A
GO:0006796	P	phosphate-containing compound metabolic process	0.0088	66	1.6e-08	662	#N/A	#N/A	#N/A	#N/A	5e-14	512	#N/A	#N/A
GO:0070647	P	protein modification by small protein conjugation or removal	0.01	9	#N/A	#N/A	#N/A	#N/A	#N/A	#N/A	0.0065	41	#N/A	#N/A
GO:0006468	P	protein phosphorylation	0.016	51	2.4e-10	542	#N/A	#N/A	#N/A	#N/A	1e-17	433	#N/A	#N/A
GO:0044237	P	cellular metabolic process	0.017	171	#N/A	#N/A	#N/A	#N/A	#N/A	#N/A	#N/A	#N/A	#N/A	#N/A
GO:0006820	P	anion transport	0.027	6	#N/A	#N/A	#N/A	#N/A	#N/A	#N/A	0.0093	28	#N/A	#N/A
GO:0016310	P	phosphorylation	0.035	52	6.2e-09	562	#N/A	#N/A	#N/A	#N/A	1.1e-14	440	#N/A	#N/A
GO:0005198	F	structural molecule activity	#N/A	#N/A	#N/A	#N/A	7.9e-13	179	#N/A	#N/A	#N/A	#N/A	1.4e-09	157
GO:0003735	F	structural constituent of ribosome	#N/A	#N/A	#N/A	#N/A	2.5e-10	161	#N/A	#N/A	#N/A	#N/A	1.6e-08	145
GO:0005507	F	copper ion binding	0.038	6	0.026	37	0.0001	42	#N/A	#N/A	#N/A	#N/A	1.9e-05	41
GO:0016491	F	oxidoreductase activity	0.00087	76	1.9e-05	650	0.002	507	0.00045	107	1.6e-05	461	8.4e-05	487
GO:0016616	F	oxidoreductase activity, acting on the CH-OH group of donors, NAD or NADP as acceptor	#N/A	#N/A	#N/A	#N/A	0.003	56	#N/A	#N/A	#N/A	#N/A	#N/A	#N/A
GO:0016684	F	oxidoreductase activity, acting on peroxide as acceptor	4.9e-08	26	5.1e-07	123	0.0041	84	3.1e-07	31	8.4e-09	98	1.8e-06	96
GO:0004601	F	peroxidase activity	4.6e-08	26	3.8e-07	123	0.0041	83	3.1e-07	31	5e-09	98	1.8e-06	95
GO:0016209	F	antioxidant activity	1.1e-07	26	1.1e-06	126	0.0041	88	3.1e-07	32	1.9e-08	100	3.7e-06	98
GO:0048037	F	cofactor binding	#N/A	#N/A	#N/A	#N/A	0.0041	146	#N/A	#N/A	#N/A	#N/A	#N/A	#N/A
GO:0016614	F	oxidoreductase activity, acting on CH-OH group of donors	#N/A	#N/A	#N/A	#N/A	0.027	59	#N/A	#N/A	#N/A	#N/A	#N/A	#N/A
GO:0033764	F	steroid dehydrogenase activity, acting on the CH-OH group of donors, NAD or NADP as acceptor	#N/A	#N/A	#N/A	#N/A	0.034	17	#N/A	#N/A	#N/A	#N/A	#N/A	#N/A
GO:0016229	F	steroid dehydrogenase activity	#N/A	#N/A	#N/A	#N/A	0.034	17	#N/A	#N/A	#N/A	#N/A	#N/A	#N/A
GO:0003854	F	3-beta-hydroxy-delta5-steroid dehydrogenase activity	#N/A	#N/A	#N/A	#N/A	0.034	17	#N/A	#N/A	#N/A	#N/A	#N/A	#N/A
GO:0043565	F	sequence-specific DNA binding	2.3e-05	21	3.4e-06	119	0.042	77	0.0077	20	1e-07	94	#N/A	#N/A
GO:0016830	F	carbon-carbon lyase activity	#N/A	#N/A	#N/A	#N/A	0.042	36	#N/A	#N/A	#N/A	#N/A	#N/A	#N/A
GO:0003723	F	RNA binding	#N/A	#N/A	#N/A	#N/A	0.046	130	#N/A	#N/A	#N/A	#N/A	#N/A	#N/A
GO:0001071	F	nucleic acid binding transcription factor activity	1.2e-13	46	5.1e-07	191	#N/A	#N/A	4.5e-07	43	3.3e-11	159	#N/A	#N/A
GO:0003700	F	transcription factor activity, sequence-specific DNA binding	1.2e-13	46	5.1e-07	191	#N/A	#N/A	4.5e-07	43	3.3e-11	159	#N/A	#N/A
GO:0016762	F	xyloglucan:xyloglucosyl transferase activity	3.3e-11	16	0.00022	34	#N/A	#N/A	1.1e-05	12	3.1e-07	33	0.0014	26
GO:0020037	F	heme binding	5.1e-07	43	0.00079	239	#N/A	#N/A	0.00056	46	3.6e-05	181	0.008	176
GO:0046906	F	tetrapyrrole binding	6.3e-07	43	0.0011	240	#N/A	#N/A	0.00069	46	6.6e-05	181	0.007	179
GO:0004553	F	hydrolase activity, hydrolyzing O-glycosyl compounds	1.4e-05	32	5.5e-05	192	#N/A	#N/A	6.4e-08	49	1.1e-08	159	0.008	134
GO:0016798	F	hydrolase activity, acting on glycosyl bonds	4e-05	32	0.00013	199	#N/A	#N/A	4.2e-08	52	1.3e-08	166	0.01	140
GO:0016758	F	transferase activity, transferring hexosyl groups	0.00052	29	0.00023	196	#N/A	#N/A	#N/A	#N/A	0.00013	143	#N/A	#N/A
GO:0016757	F	transferase activity, transferring glycosyl groups	0.00059	32	3.8e-05	231	#N/A	#N/A	#N/A	#N/A	7.3e-06	171	0.038	154
GO:0004722	F	protein serine/threonine phosphatase activity	0.0012	10	#N/A	#N/A	#N/A	#N/A	1.9e-05	16	#N/A	#N/A	#N/A	#N/A
GO:0070001	F	aspartic-type peptidase activity	0.002	12	#N/A	#N/A	#N/A	#N/A	0.00045	17	#N/A	#N/A	#N/A	#N/A
GO:0004190	F	aspartic-type endopeptidase activity	0.002	12	#N/A	#N/A	#N/A	#N/A	0.00045	17	#N/A	#N/A	#N/A	#N/A
GO:0043531	F	ADP binding	0.0023	17	#N/A	#N/A	#N/A	#N/A	0.0013	23	#N/A	#N/A	#N/A	#N/A
GO:0005516	F	calmodulin binding	0.0024	6	0.00014	30	#N/A	#N/A	#N/A	#N/A	0.0095	18	#N/A	#N/A
GO:0001871	F	pattern binding	0.0049	9	#N/A	#N/A	#N/A	#N/A	#N/A	#N/A	0.014	34	#N/A	#N/A
GO:0030247	F	polysaccharide binding	0.0049	9	#N/A	#N/A	#N/A	#N/A	#N/A	#N/A	0.014	34	#N/A	#N/A
GO:0003824	F	catalytic activity	0.0057	263	1.7e-12	2762	#N/A	#N/A	0.0013	386	6e-15	1957	0.022	1911
GO:0004721	F	phosphoprotein phosphatase activity	0.0057	10	#N/A	#N/A	#N/A	#N/A	0.00037	16	#N/A	#N/A	#N/A	#N/A
GO:0016791	F	phosphatase activity	0.0059	12	#N/A	#N/A	#N/A	#N/A	0.0022	17	#N/A	#N/A	#N/A	#N/A
GO:0030246	F	carbohydrate binding	0.0059	13	0.0047	82	#N/A	#N/A	#N/A	#N/A	0.014	57	#N/A	#N/A
GO:0004842	F	ubiquitin-protein transferase activity	0.014	9	0.048	51	#N/A	#N/A	#N/A	#N/A	0.0071	41	#N/A	#N/A
GO:0004175	F	endopeptidase activity	0.015	18	#N/A	#N/A	#N/A	#N/A	0.012	25	#N/A	#N/A	#N/A	#N/A
GO:0019787	F	ubiquitin-like protein transferase activity	0.018	9	#N/A	#N/A	#N/A	#N/A	#N/A	#N/A	0.0095	42	#N/A	#N/A
GO:0004672	F	protein kinase activity	0.026	51	3.9e-11	547	#N/A	#N/A	#N/A	#N/A	2.9e-18	437	#N/A	#N/A
GO:0042578	F	phosphoric ester hydrolase activity	0.026	12	#N/A	#N/A	#N/A	#N/A	0.0077	18	#N/A	#N/A	#N/A	#N/A
GO:0016301	F	kinase activity	0.032	55	3.6e-10	587	#N/A	#N/A	#N/A	#N/A	1.1e-16	463	#N/A	#N/A
GO:0005840	C	ribosome	#N/A	#N/A	#N/A	#N/A	1.9e-10	160	#N/A	#N/A	#N/A	#N/A	1.3e-08	144
GO:0044444	C	cytoplasmic part	#N/A	#N/A	#N/A	#N/A	2e-10	289	#N/A	#N/A	#N/A	#N/A	0.00098	222
GO:0005737	C	cytoplasm	#N/A	#N/A	#N/A	#N/A	2.1e-10	336	#N/A	#N/A	#N/A	#N/A	0.0033	255
GO:1990904	C	ribonucleoprotein complex	#N/A	#N/A	#N/A	#N/A	2.9e-09	173	#N/A	#N/A	#N/A	#N/A	7.4e-08	158
GO:0030529	C	intracellular ribonucleoprotein complex	#N/A	#N/A	#N/A	#N/A	2.9e-09	173	#N/A	#N/A	#N/A	#N/A	7.4e-08	158
GO:0043232	C	intracellular non-membrane-bounded organelle	#N/A	#N/A	#N/A	#N/A	1.8e-05	227	#N/A	#N/A	#N/A	#N/A	1.3e-05	215
GO:0043228	C	non-membrane-bounded organelle	#N/A	#N/A	#N/A	#N/A	1.8e-05	227	#N/A	#N/A	#N/A	#N/A	1.3e-05	215
GO:0030120	C	vesicle coat	#N/A	#N/A	#N/A	#N/A	0.00035	21	#N/A	#N/A	#N/A	#N/A	0.00098	19
GO:0044464	C	cell part	#N/A	#N/A	#N/A	#N/A	0.00035	641	#N/A	#N/A	#N/A	#N/A	0.032	563
GO:0016023	C	cytoplasmic, membrane-bounded vesicle	#N/A	#N/A	#N/A	#N/A	0.00035	21	#N/A	#N/A	#N/A	#N/A	0.00098	19
GO:0005623	C	cell	#N/A	#N/A	#N/A	#N/A	0.00035	641	#N/A	#N/A	#N/A	#N/A	0.032	563
GO:0044433	C	cytoplasmic vesicle part	#N/A	#N/A	#N/A	#N/A	0.00035	21	#N/A	#N/A	#N/A	#N/A	0.00098	19
GO:0030662	C	coated vesicle membrane	#N/A	#N/A	#N/A	#N/A	0.00035	21	#N/A	#N/A	#N/A	#N/A	0.00098	19
GO:0030660	C	Golgi-associated vesicle membrane	#N/A	#N/A	#N/A	#N/A	0.00035	15	#N/A	#N/A	#N/A	#N/A	0.002	12
GO:0012506	C	vesicle membrane	#N/A	#N/A	#N/A	#N/A	0.00035	21	#N/A	#N/A	#N/A	#N/A	0.00098	19
GO:0031988	C	membrane-bounded vesicle	#N/A	#N/A	#N/A	#N/A	0.00035	21	#N/A	#N/A	#N/A	#N/A	0.00098	19
GO:0030659	C	cytoplasmic vesicle membrane	#N/A	#N/A	#N/A	#N/A	0.00035	21	#N/A	#N/A	#N/A	#N/A	0.00098	19
GO:0005798	C	Golgi-associated vesicle	#N/A	#N/A	#N/A	#N/A	0.00035	15	#N/A	#N/A	#N/A	#N/A	0.002	12
GO:0031982	C	vesicle	#N/A	#N/A	#N/A	#N/A	0.00035	21	#N/A	#N/A	#N/A	#N/A	0.00098	19
GO:0097708	C	intracellular vesicle	#N/A	#N/A	#N/A	#N/A	0.00035	21	#N/A	#N/A	#N/A	#N/A	0.00098	19
GO:0031410	C	cytoplasmic vesicle	#N/A	#N/A	#N/A	#N/A	0.00035	21	#N/A	#N/A	#N/A	#N/A	0.00098	19
GO:0030135	C	coated vesicle	#N/A	#N/A	#N/A	#N/A	0.00035	21	#N/A	#N/A	#N/A	#N/A	0.00098	19
GO:0098805	C	whole membrane	#N/A	#N/A	#N/A	#N/A	0.00035	35	#N/A	#N/A	#N/A	#N/A	0.023	25
GO:0043226	C	organelle	#N/A	#N/A	#N/A	#N/A	0.00036	467	#N/A	#N/A	#N/A	#N/A	#N/A	#N/A
GO:0043229	C	intracellular organelle	#N/A	#N/A	#N/A	#N/A	0.00036	467	#N/A	#N/A	#N/A	#N/A	#N/A	#N/A
GO:0048475	C	coated membrane	#N/A	#N/A	#N/A	#N/A	0.00046	27	#N/A	#N/A	#N/A	#N/A	0.0032	23
GO:0030117	C	membrane coat	#N/A	#N/A	#N/A	#N/A	0.00046	27	#N/A	#N/A	#N/A	#N/A	0.0032	23
GO:0016020	C	membrane	#N/A	#N/A	0.03	702	0.00058	576	#N/A	#N/A	0.023	490	1.3e-05	567
GO:0012505	C	endomembrane system	#N/A	#N/A	#N/A	#N/A	0.0006	71	#N/A	#N/A	#N/A	#N/A	#N/A	#N/A
GO:0032991	C	macromolecular complex	#N/A	#N/A	#N/A	#N/A	0.00066	343	#N/A	#N/A	#N/A	#N/A	0.00026	332
GO:0098588	C	bounding membrane of organelle	#N/A	#N/A	#N/A	#N/A	0.00074	38	#N/A	#N/A	#N/A	#N/A	0.035	28
GO:0005622	C	intracellular	#N/A	#N/A	#N/A	#N/A	0.00094	594	#N/A	#N/A	#N/A	#N/A	#N/A	#N/A
GO:0098796	C	membrane protein complex	#N/A	#N/A	#N/A	#N/A	0.0026	82	#N/A	#N/A	#N/A	#N/A	0.0032	77
GO:0044425	C	membrane part	#N/A	#N/A	#N/A	#N/A	0.0032	351	#N/A	#N/A	#N/A	#N/A	0.002	333
GO:0005874	C	microtubule	#N/A	#N/A	0.03	21	0.0037	19	#N/A	#N/A	#N/A	#N/A	0.031	15
GO:0031090	C	organelle membrane	#N/A	#N/A	#N/A	#N/A	0.0041	43	#N/A	#N/A	#N/A	#N/A	#N/A	#N/A
GO:0044424	C	intracellular part	#N/A	#N/A	#N/A	#N/A	0.0042	562	#N/A	#N/A	#N/A	#N/A	#N/A	#N/A
GO:0099512	C	supramolecular fiber	#N/A	#N/A	0.03	23	0.0057	20	#N/A	#N/A	#N/A	#N/A	#N/A	#N/A
GO:0099513	C	polymeric cytoskeletal fiber	#N/A	#N/A	0.03	23	0.0057	20	#N/A	#N/A	#N/A	#N/A	#N/A	#N/A
GO:0098797	C	plasma membrane protein complex	#N/A	#N/A	#N/A	#N/A	0.0059	14	#N/A	#N/A	#N/A	#N/A	0.021	12
GO:0005905	C	clathrin-coated pit	#N/A	#N/A	#N/A	#N/A	0.0059	8	#N/A	#N/A	#N/A	#N/A	0.035	6
GO:0030140	C	trans-Golgi network transport vesicle	#N/A	#N/A	#N/A	#N/A	0.0059	8	#N/A	#N/A	#N/A	#N/A	0.035	6
GO:0030665	C	clathrin-coated vesicle membrane	#N/A	#N/A	#N/A	#N/A	0.0059	8	#N/A	#N/A	#N/A	#N/A	0.035	6
GO:0030125	C	clathrin vesicle coat	#N/A	#N/A	#N/A	#N/A	0.0059	8	#N/A	#N/A	#N/A	#N/A	0.035	6
GO:0098589	C	membrane region	#N/A	#N/A	#N/A	#N/A	0.0059	8	#N/A	#N/A	#N/A	#N/A	0.035	6
GO:0030130	C	clathrin coat of trans-Golgi network vesicle	#N/A	#N/A	#N/A	#N/A	0.0059	8	#N/A	#N/A	#N/A	#N/A	0.035	6
GO:0030132	C	clathrin coat of coated pit	#N/A	#N/A	#N/A	#N/A	0.0059	8	#N/A	#N/A	#N/A	#N/A	0.035	6
GO:0030136	C	clathrin-coated vesicle	#N/A	#N/A	#N/A	#N/A	0.0059	8	#N/A	#N/A	#N/A	#N/A	0.035	6
GO:0012510	C	trans-Golgi network transport vesicle membrane	#N/A	#N/A	#N/A	#N/A	0.0059	8	#N/A	#N/A	#N/A	#N/A	0.035	6
GO:0044459	C	plasma membrane part	#N/A	#N/A	#N/A	#N/A	0.006	15	#N/A	#N/A	#N/A	#N/A	0.012	14
GO:0044431	C	Golgi apparatus part	#N/A	#N/A	#N/A	#N/A	0.0064	20	#N/A	#N/A	#N/A	#N/A	#N/A	#N/A
GO:0005886	C	plasma membrane	#N/A	#N/A	#N/A	#N/A	0.0064	20	#N/A	#N/A	#N/A	#N/A	0.019	18
GO:0030658	C	transport vesicle membrane	#N/A	#N/A	#N/A	#N/A	0.0076	14	#N/A	#N/A	#N/A	#N/A	0.016	13
GO:0016469	C	proton-transporting two-sector ATPase complex	#N/A	#N/A	#N/A	#N/A	0.0076	28	#N/A	#N/A	#N/A	#N/A	#N/A	#N/A
GO:0030133	C	transport vesicle	#N/A	#N/A	#N/A	#N/A	0.0076	14	#N/A	#N/A	#N/A	#N/A	0.016	13
GO:0030118	C	clathrin coat	#N/A	#N/A	#N/A	#N/A	0.0087	10	#N/A	#N/A	#N/A	#N/A	0.037	8
GO:0005741	C	mitochondrial outer membrane	#N/A	#N/A	#N/A	#N/A	0.0087	11	#N/A	#N/A	#N/A	#N/A	#N/A	#N/A
GO:0031968	C	organelle outer membrane	#N/A	#N/A	#N/A	#N/A	0.0087	11	#N/A	#N/A	#N/A	#N/A	#N/A	#N/A
GO:0030663	C	COPI-coated vesicle membrane	#N/A	#N/A	#N/A	#N/A	0.0096	7	#N/A	#N/A	#N/A	#N/A	0.031	6
GO:0030126	C	COPI vesicle coat	#N/A	#N/A	#N/A	#N/A	0.0096	7	#N/A	#N/A	#N/A	#N/A	0.031	6
GO:0030137	C	COPI-coated vesicle	#N/A	#N/A	#N/A	#N/A	0.0096	7	#N/A	#N/A	#N/A	#N/A	0.031	6
GO:0005794	C	Golgi apparatus	#N/A	#N/A	#N/A	#N/A	0.011	20	#N/A	#N/A	#N/A	#N/A	0.038	17
GO:0019867	C	outer membrane	#N/A	#N/A	#N/A	#N/A	0.012	13	#N/A	#N/A	#N/A	#N/A	#N/A	#N/A
GO:0005852	C	eukaryotic translation initiation factor 3 complex	#N/A	#N/A	#N/A	#N/A	0.015	13	#N/A	#N/A	#N/A	#N/A	#N/A	#N/A
GO:0044391	C	ribosomal subunit	#N/A	#N/A	#N/A	#N/A	0.016	14	#N/A	#N/A	#N/A	#N/A	0.042	12
GO:0005783	C	endoplasmic reticulum	#N/A	#N/A	#N/A	#N/A	0.029	36	#N/A	#N/A	#N/A	#N/A	#N/A	#N/A
GO:0033177	C	proton-transporting two-sector ATPase complex, proton-transporting domain	#N/A	#N/A	#N/A	#N/A	0.03	12	#N/A	#N/A	#N/A	#N/A	#N/A	#N/A
GO:0048046	C	apoplast	2.6e-11	16	0.00056	34	#N/A	#N/A	1.9e-05	12	1.1e-06	33	0.0007	26
GO:0005576	C	extracellular region	7e-10	17	0.00056	46	#N/A	#N/A	7.5e-05	13	2.8e-06	41	0.0019	32
GO:0030312	C	external encapsulating structure	2.4e-08	19	#N/A	#N/A	#N/A	#N/A	4.6e-05	18	0.0059	45	0.038	39
GO:0005618	C	cell wall	2.4e-08	19	#N/A	#N/A	#N/A	#N/A	4.6e-05	18	0.0059	45	0.038	39
GO:0071944	C	cell periphery	1.7e-07	22	#N/A	#N/A	#N/A	#N/A	0.00027	21	#N/A	#N/A	0.0011	68
